# Supplementary material for: Define the Two Molecular Subtypes of Epithelioid Malignant Pleural Mesothelioma
Source: MDPI journal article supplement (doi:10.3390/cells11182924), 2022-09-19
Supplement: s1 [file s1]

| Category | Term |
|----------|------|
|----------|------|

### Enriched GO BP terms by genes over-expressed in Subtype II eMPM

GOTERM\_BP\_DIRECT GO:0009615~response to virus

|                  |                                                           |    |          |          |              |     |     |       |          |          |          |          |
|------------------|-----------------------------------------------------------|----|----------|----------|--------------|-----|-----|-------|----------|----------|----------|----------|
| GOTERM_BP_DIRECT | GO:0060337~type I interferon signaling pathway            | 7  | 3.888889 | 3.35E-05 | RSAD2, MX    | 162 | 64  | 16792 | 11.33719 | 0.027956 | 0.014177 | 0.014177 |
| GOTERM_BP_DIRECT | GO:0051607~defense response to virus                      | 8  | 4.444444 | 0.001071 | RSAD2, MX    | 162 | 165 | 16792 | 5.025664 | 0.595949 | 0.301909 | 0.301909 |
| GOTERM_BP_DIRECT | GO:0034765~regulation of ion transmembrane transport      | 6  | 3.333333 | 0.004316 | KCNH5, KC    | 162 | 111 | 16792 | 5.602936 | 0.97424  | 0.912756 | 0.912756 |
| GOTERM_BP_DIRECT | GO:0006069~ethanol oxidation                              | 3  | 1.666667 | 0.005661 | ADH1B, AD    | 162 | 12  | 16792 | 25.91358 | 0.991794 | 0.957854 | 0.957854 |
| GOTERM_BP_DIRECT | GO:0006813~potassium ion transport                        | 5  | 2.777778 | 0.007978 | SLC24A3, K   | 162 | 82  | 16792 | 6.320385 | 0.99886  | 1        | 1        |
| GOTERM_BP_DIRECT | GO:0016042~lipid catabolic process                        | 5  | 2.777778 | 0.009035 | LIPF, RARR   | 162 | 85  | 16792 | 6.097313 | 0.999537 | 1        | 1        |
| GOTERM_BP_DIRECT | GO:0072236~metanephric loop of Henle development          | 2  | 1.111111 | 0.019084 | WNT7B, PC    | 162 | 2   | 16792 | 103.6543 | 1        | 1        | 1        |
| GOTERM_BP_DIRECT | GO:0006898~receptor-mediated endocytosis                  | 6  | 3.333333 | 0.033625 | AMN, DME     | 162 | 186 | 16792 | 3.343688 | 1        | 1        | 1        |
| GOTERM_BP_DIRECT | GO:0042391~regulation of membrane potential               | 4  | 2.222222 | 0.035368 | KCNH5, KC    | 162 | 75  | 16792 | 5.52823  | 1        | 1        | 1        |
| GOTERM_BP_DIRECT | GO:0007267~cell-cell signaling                            | 7  | 3.888889 | 0.035678 | CRB1, VIPR   | 162 | 254 | 16792 | 2.856615 | 1        | 1        | 1        |
| GOTERM_BP_DIRECT | GO:0014066~regulation of phosphatidylinositol 3-kinase s  | 4  | 2.222222 | 0.039037 | BTC, FGF7    | 162 | 78  | 16792 | 5.315606 | 1        | 1        | 1        |
| GOTERM_BP_DIRECT | GO:0042594~response to starvation                         | 3  | 1.666667 | 0.044221 | SSTR1, IPA   | 162 | 35  | 16792 | 8.884656 | 1        | 1        | 1        |
| GOTERM_BP_DIRECT | GO:0051902~negative regulation of mitochondrial depola    | 2  | 1.111111 | 0.047034 | HS2D, HSH    | 162 | 5   | 16792 | 41.46173 | 1        | 1        | 1        |
| GOTERM_BP_DIRECT | GO:0038170~somatostatin signaling pathway                 | 2  | 1.111111 | 0.047034 | SSTR1, SST   | 162 | 5   | 16792 | 41.46173 | 1        | 1        | 1        |
| GOTERM_BP_DIRECT | GO:0003081~regulation of systemic arterial blood pressur  | 2  | 1.111111 | 0.056174 | ACE2, NOX    | 162 | 6   | 16792 | 34.55144 | 1        | 1        | 1        |
| GOTERM_BP_DIRECT | GO:0001895~retina homeostasis                             | 3  | 1.666667 | 0.056211 | ARMS2, AL    | 162 | 40  | 16792 | 7.774074 | 1        | 1        | 1        |
| GOTERM_BP_DIRECT | GO:0007190~activation of adenylate cyclase activity       | 3  | 1.666667 | 0.056211 | VIPR2, CRH   | 162 | 40  | 16792 | 7.774074 | 1        | 1        | 1        |
| GOTERM_BP_DIRECT | GO:0045071~negative regulation of viral genome replicati  | 3  | 1.666667 | 0.056211 | RSAD2, MX    | 162 | 40  | 16792 | 7.774074 | 1        | 1        | 1        |
| GOTERM_BP_DIRECT | GO:0055114~oxidation-reduction process                    | 11 | 6.111111 | 0.059086 | LIPF, C15O   | 162 | 592 | 16792 | 1.926009 | 1        | 1        | 1        |
| GOTERM_BP_DIRECT | GO:0006874~cellular calcium ion homeostasis               | 4  | 2.222222 | 0.060117 | PKHD1, SL    | 162 | 93  | 16792 | 4.45825  | 1        | 1        | 1        |
| GOTERM_BP_DIRECT | GO:0046854~phosphatidylinositol phosphorylation           | 4  | 2.222222 | 0.061679 | BTC, FGF7    | 162 | 94  | 16792 | 4.410822 | 1        | 1        | 1        |
| GOTERM_BP_DIRECT | GO:0008202~steroid metabolic process                      | 3  | 1.666667 | 0.063887 | HSD17B6, I   | 162 | 43  | 16792 | 7.231697 | 1        | 1        | 1        |
| GOTERM_BP_DIRECT | GO:0007187~G-protein coupled receptor signaling pathwa    | 3  | 1.666667 | 0.071892 | NPY1R, SS    | 162 | 46  | 16792 | 6.760064 | 1        | 1        | 1        |
| GOTERM_BP_DIRECT | GO:0048513~animal organ development                       | 2  | 1.111111 | 0.074193 | NRG3, NRC    | 162 | 8   | 16792 | 25.91358 | 1        | 1        | 1        |
| GOTERM_BP_DIRECT | GO:0008284~positive regulation of cell proliferation      | 9  | 5        | 0.080103 | PKHD1, BT    | 162 | 466 | 16792 | 2.001907 | 1        | 1        | 1        |
| GOTERM_BP_DIRECT | GO:0035457~cellular response to interferon-alpha          | 2  | 1.111111 | 0.083074 | IFIT3, IFIT2 | 162 | 9   | 16792 | 23.03429 | 1        | 1        | 1        |
| GOTERM_BP_DIRECT | GO:0010579~positive regulation of adenylate cyclase acti  | 2  | 1.111111 | 0.083074 | CRHR1, DR    | 162 | 9   | 16792 | 23.03429 | 1        | 1        | 1        |
| GOTERM_BP_DIRECT | GO:0010389~regulation of G2/M transition of mitotic cell  | 2  | 1.111111 | 0.083074 | KCNH5, CD    | 162 | 9   | 16792 | 23.03429 | 1        | 1        | 1        |
| GOTERM_BP_DIRECT | GO:0010838~positive regulation of keratinocyte proliferat | 2  | 1.111111 | 0.083074 | TGM1, FG     | 162 | 9   | 16792 | 23.03429 | 1        | 1        | 1        |
| GOTERM_BP_DIRECT | GO:0042359~vitamin D metabolic process                    | 2  | 1.111111 | 0.09187  | CYP24A1, C   | 162 | 10  | 16792 | 20.73086 | 1        | 1        | 1        |
