# Supplementary material for: Define the Two Molecular Subtypes of Epithelioid Malignant Pleural Mesothelioma
Source: MDPI journal article supplement (doi:10.3390/cells11182924), 2022-09-19
Supplement: s1 [file s1]

Table S4. Biological process enriched in each subtypes of Mesothelioma. Enriched KEGG terms by genes over-expressed in Subtype I.

| Category     | Term                                         | Count | %        | PValue   | Genes               | List Total | Pop Hits | Pop Total | Fold Enric | Bonferron | Benjamini | FDR      |
|--------------|----------------------------------------------|-------|----------|----------|---------------------|------------|----------|-----------|------------|-----------|-----------|----------|
| KEGG_PATHWAY | hsa00053:Ascorbate and aldarate metabolism   | 5     | 2.73224  | 5.60E-05 | UGT1A10, UGT1A1, I  | 56         | 27       | 6879      | 22.74802   | 0.005975  | 0.004495  | 0.004327 |
| KEGG_PATHWAY | hsa00140:Steroid hormone biosynthesis        | 6     | 3.278689 | 9.01E-05 | UGT1A10, UGT1A1, I  | 56         | 58       | 6879      | 12.70751   | 0.009599  | 0.004495  | 0.004327 |
| KEGG_PATHWAY | hsa00040:Pentose and glucuronate intercon    | 5     | 2.73224  | 1.26E-04 | UGT1A10, UGT1A1, I  | 56         | 33       | 6879      | 18.61201   | 0.013394  | 0.004495  | 0.004327 |
| KEGG_PATHWAY | hsa00860:Porphyrin and chlorophyll metabol   | 5     | 2.73224  | 3.27E-04 | UGT1A10, UGT1A1, I  | 56         | 42       | 6879      | 14.62372   | 0.034368  | 0.008742  | 0.008415 |
| KEGG_PATHWAY | hsa00983:Drug metabolism - other enzymes     | 5     | 2.73224  | 4.65E-04 | UGT1A10, UGT1A1, I  | 56         | 46       | 6879      | 13.3521    | 0.048578  | 0.009957  | 0.009585 |
| KEGG_PATHWAY | hsa00830:Retinol metabolism                  | 5     | 2.73224  | 0.001629 | UGT1A10, UGT1A1, I  | 56         | 64       | 6879      | 9.596819   | 0.16006   | 0.029047  | 0.027961 |
| KEGG_PATHWAY | hsa00982:Drug metabolism - cytochrome P45    | 5     | 2.73224  | 0.002039 | UGT1A10, UGT1A1, I  | 56         | 68       | 6879      | 9.0323     | 0.196193  | 0.031168  | 0.030003 |
| KEGG_PATHWAY | hsa00980:Metabolism of xenobiotics by cytox  | 5     | 2.73224  | 0.002781 | UGT1A10, UGT1A1, I  | 56         | 74       | 6879      | 8.299952   | 0.257664  | 0.037192  | 0.035802 |
| KEGG_PATHWAY | hsa05204:Chemical carcinogenesis             | 5     | 2.73224  | 0.00369  | UGT1A10, UGT1A1, I  | 56         | 80       | 6879      | 7.677455   | 0.326662  | 0.043864  | 0.042224 |
| KEGG_PATHWAY | hsa04512:ECM-receptor interaction            | 5     | 2.73224  | 0.004983 | IBSP, SV2A, COL11A1 | 56         | 87       | 6879      | 7.059729   | 0.41405   | 0.053319  | 0.051326 |
| KEGG_PATHWAY | hsa04020:Calcium signaling pathway           | 5     | 2.73224  | 0.05415  | HTR6, OXTR, TNNC1,  | 56         | 179      | 6879      | 3.431265   | 0.997412  | 0.526728  | 0.507038 |
| KEGG_PATHWAY | hsa04024:cAMP signaling pathway              | 5     | 2.73224  | 0.072896 | HTR6, OXTR, NPY, CA | 56         | 198      | 6879      | 3.102002   | 0.999696  | 0.649985  | 0.625687 |
| KEGG_PATHWAY | hsa04510:Focal adhesion                      | 5     | 2.73224  | 0.08167  | SHC3, IBSP, COL11A1 | 56         | 206      | 6879      | 2.981536   | 0.99989   | 0.67221   | 0.64708  |
| KEGG_PATHWAY | hsa04310:Wnt signaling pathway               | 4     | 2.185792 | 0.097667 | MMP7, CAMK2A, FZD   | 56         | 138      | 6879      | 3.560559   | 0.999983  | 0.712584  | 0.685945 |
| KEGG_PATHWAY | hsa05412:Arrhythmogenic right ventricular ca | 3     | 1.639344 | 0.099895 | CDH2, CACNA2D1, IT  | 56         | 67       | 6879      | 5.500267   | 0.999987  | 0.712584  | 0.685945 |

Enriched KEGG terms by genes over-expressed in Subtype II of Mesothelioma.

| Category     | Term                                         | Count | %        | PValue   | Genes             | List Total | Pop Hits | Pop Total | Fold Enric | Bonferron | Benjamini | FDR      |
|--------------|----------------------------------------------|-------|----------|----------|-------------------|------------|----------|-----------|------------|-----------|-----------|----------|
| KEGG_PATHWAY | hsa00830:Retinol metabolism                  | 7     | 3.888889 | 7.78E-05 | ADH1B, ADH1A, RDP | 79         | 64       | 6879      | 9.523932   | 0.009755  | 0.009803  | 0.009803 |
| KEGG_PATHWAY | hsa00350:Tyrosine metabolism                 | 4     | 2.222222 | 0.007072 | ADH1B, TAT, ADH1A | 79         | 35       | 6879      | 9.951537   | 0.591095  | 0.445553  | 0.445553 |
| KEGG_PATHWAY | hsa05204:Chemical carcinogenesis             | 5     | 2.777778 | 0.012624 | ADH1B, ADH1A, CYP | 79         | 80       | 6879      | 5.442247   | 0.798265  | 0.530225  | 0.530225 |
| KEGG_PATHWAY | hsa00982:Drug metabolism - cytochrome P45    | 4     | 2.222222 | 0.041547 | ADH1B, ADH1A, CYP | 79         | 68       | 6879      | 5.122115   | 0.995237  | 1         | 1        |
| KEGG_PATHWAY | hsa00980:Metabolism of xenobiotics by cytox  | 4     | 2.222222 | 0.051238 | ADH1B, ADH1A, CYP | 79         | 74       | 6879      | 4.706808   | 0.998676  | 1         | 1        |
| KEGG_PATHWAY | hsa00400:Phenylalanine, tyrosine and tryptop | 2     | 1.111111 | 0.055439 | TAT, PAH          | 79         | 5        | 6879      | 34.83038   | 0.999243  | 1         | 1        |
| KEGG_PATHWAY | hsa00071:Fatty acid degradation              | 3     | 1.666667 | 0.081706 | ADH1B, ADH1A, ADH | 79         | 42       | 6879      | 6.219711   | 0.999978  | 1         | 1        |
