# Supplementary material for: Define the Two Molecular Subtypes of Epithelioid Malignant Pleural Mesothelioma
Source: MDPI journal article supplement (doi:10.3390/cells11182924), 2022-09-19
Supplement: s1 [file s1]

**Table S1. Clinicopathologic Characteristics of eMPM (N=57)**

| <b>Characteristic</b>    | <b>Patients, n(%)</b> | <b>Subtype I</b> | <b>Subtype II</b> | <b>Others</b> | <b><i>P value</i></b> |
|--------------------------|-----------------------|------------------|-------------------|---------------|-----------------------|
| <b>Total number</b>      | 57                    | 44               | 11                | 2             |                       |
| <b>Age (year)</b>        |                       |                  |                   |               | 0.365                 |
| Mean                     | 61.08                 | 60.09            | 64.45             | 64.5          |                       |
| Range                    | 28-81                 | 28-81            | 54-75             | 60-69         |                       |
| <b>Sex</b>               |                       |                  |                   |               | 1                     |
| Female                   | 13                    | 11               | 2                 | 0             |                       |
| Male                     | 44                    | 33               | 9                 | 2             |                       |
| <b>Laterality</b>        |                       |                  |                   |               | 0.3492                |
| Left                     | 22                    | 17               | 3                 | 2             |                       |
| Right                    | 32                    | 24               | 8                 | 0             |                       |
| Bilateral                | 3                     | 3                | 0                 | 0             |                       |
| <b>Disease detection</b> |                       |                  |                   |               | 0.2861                |
| Biopsy                   | 34                    | 26               | 7                 | 1             |                       |
| Cytology                 | 2                     | 1                | 0                 | 1             |                       |
| Thoracentesis            | 1                     | 1                | 0                 | 0             |                       |
| Thorascopy               | 9                     | 6                | 3                 | 0             |                       |
| <b>Stages</b>            |                       |                  |                   |               | 0.588                 |
| I                        | 5                     | 4                | 1                 | 0             |                       |
| IA                       | 1                     | 1                | 0                 | 0             |                       |
| II                       | 12                    | 8                | 4                 | 0             |                       |
| III                      | 29                    | 24               | 3                 | 2             |                       |
| IV                       | 10                    | 7                | 3                 | 0             |                       |
| <b>Radiation therapy</b> |                       |                  |                   |               | 0.8782                |
| Yes                      | 19                    | 15               | 3                 | 1             |                       |
| No                       | 37                    | 28               | 8                 | 1             |                       |
| <b>Days to death</b>     |                       |                  |                   |               | 0.0049*               |
| Median                   | 567.5                 | 463              | 791.5             | 64.5          |                       |
| Range                    | 39-2790               | 39-1302          | 244-2790          | 361-949       |                       |
| <b>Event</b>             |                       |                  |                   |               | 0.7887                |
| Alive                    | 11                    | 8                | 3                 | 0             |                       |
| Dead                     | 46                    | 36               | 8                 | 2             |                       |
