# Supplementary material for: Define the Two Molecular Subtypes of Epithelioid Malignant Pleural Mesothelioma
Source: MDPI journal article supplement (doi:10.3390/cells11182924), 2022-09-19
Supplement: s1 [file s1]

**Table S2.** Results of SAM analysis between different subtypes of eMPM in TCGA.

Data is representing overexpression of gene in two subtype in positive and minus value.

(1).Gene were ordered according the SAM significance, gene with the positive value were

overexpressed in subtype II of eMPM whereas minus value genes were overexpressed in subtype I.

(2).Significance increased with decreased of absolute values of ranks from 10 to 1 or -10-1.Rank 1 or -1 genes are the most significant of SAM results.

| Gene symbol  | TCGA sitosII    | Gene symbol    | TCGA sitosII      | Gene symbol      | TCGA sitosII | Gene symbol | TCGA sitosII | Gene symbol | TCGA sitosII |
|--------------|-----------------|----------------|-------------------|------------------|--------------|-------------|--------------|-------------|--------------|
| TLX3         | -1161 SLC2A3    | -858 TNNI3     | -554 LOC283404    | -250 KRT39       | 55           |             |              |             |              |
| GIPR         | -1160 RIPPVY2   | -857 CHMP4C    | -553 HOXA11       | -249 CCBP2       | 56           |             |              |             |              |
| DUOX2        | -1159 SLC17A8   | -856 AMHR2     | -552 PCDH10       | -248 DMBT1       | 57           |             |              |             |              |
| CABP4        | -1158 C2orf27A  | -855 RTN4RL2   | -551 CORO6        | -247 FAM19A4     | 58           |             |              |             |              |
| C17orf64     | -1157 ZBED2     | -854 CREB3L1   | -550 PRSS35       | -246 SLC10A1     | 59           |             |              |             |              |
| STK33        | -1156 DLX2      | -853 ADAMTS4   | -549 PTH2R        | -245 HS3ST6      | 60           |             |              |             |              |
| CDH7         | -1155 LOC344967 | -852 PURG      | -548 PAQR9        | -244 KCNJ13      | 61           |             |              |             |              |
| CDH18        | -1154 FAT4      | -851 C11orf70  | -547 GSG1         | -243 SLC30A2     | 62           |             |              |             |              |
| ANKRD34A     | -1153 SLC39A14  | -850 TNFRSF19  | -546 E2F7         | -242 CRHR1       | 63           |             |              |             |              |
| SLC4A8       | -1152 ITGA7     | -849 SPATA8    | -545 SP7          | -241 C6orf176    | 64           |             |              |             |              |
| TCN1         | -1151 IGLON5    | -848 DPYSL4    | -544 PPP4R1L      | -240 BTC         | 65           |             |              |             |              |
| DACT3        | -1150 SMC1B     | -847 OPN4      | -543 LOC100190938 | -239 ZNF385B     | 66           |             |              |             |              |
| TMEM139      | -1149 HMP19     | -846 F12       | -542 NDRG4        | -238 SHISA3      | 67           |             |              |             |              |
| B3GNT3       | -1148 GPR173    | -845 DLGAP5    | -541 PRKG1        | -237 RBP5        | 68           |             |              |             |              |
| SYT14        | -1147 REM1      | -844 FXYD7     | -540 ALDH1A3      | -236 FRMPD4      | 69           |             |              |             |              |
| PRSS8        | -1146 KLF17     | -843 TRPS1     | -539 PDLIM3       | -235 CYP24A1     | 70           |             |              |             |              |
| PCDH19       | -1145 FOXB1     | -842 SLFN13    | -538 FSD1         | -234 AIPL1       | 71           |             |              |             |              |
| ZNF582       | -1144 EPOR      | -841 LHX2      | -537 DPYSL3       | -233 HRASLS2     | 72           |             |              |             |              |
| UTF1         | -1143 CNTN5     | -840 RHOBTB1   | -536 SGCG         | -232 CYP3A4      | 73           |             |              |             |              |
| NUAK1        | -1142 ESPL1     | -839 COL7A1    | -535 OVCH2        | -231 MAB21L2     | 74           |             |              |             |              |
| DUSP7        | -1141 ARID5B    | -838 IL11      | -534 DRP2         | -230 NRG4        | 75           |             |              |             |              |
| CIQTNF2      | -1140 SPRED3    | -837 NAV1      | -533 ST6GALNAC5   | -229 DKFZp779M06 | 76           |             |              |             |              |
| SERINC2      | -1139 DCBLD1    | -836 GREB1L    | -532 ZSCAN12P1    | -228 DHODH       | 77           |             |              |             |              |
| KRT33B       | -1138 CFHR3     | -835 DAD1L     | -531 DNAJC12      | -227 SLC24A3     | 78           |             |              |             |              |
| SLC19A2      | -1137 HTR1F     | -834 CREB5     | -530 FAM133A      | -226 CNTFR       | 79           |             |              |             |              |
| ZIC4         | -1136 HOXA4     | -833 ITGB3     | -529 ITGA11       | -225 LOC400759   | 80           |             |              |             |              |
| COL12A1      | -1135 CTH       | -832 CNKSR3    | -528 KIF14        | -224 LPPR1       | 81           |             |              |             |              |
| C9orf84      | -1134 RSPH4A    | -831 UBE2Q2P1  | -527 COMP         | -223 KCND3       | 82           |             |              |             |              |
| PTCH2        | -1133 USH1C     | -830 FAM19A3   | -526 ETV4         | -222 CLRN3       | 83           |             |              |             |              |
| LOC644538    | -1132 NAALADL1  | -829 ENAH      | -525 PEAR1        | -221 SERPINB10   | 84           |             |              |             |              |
| FAM101B      | -1131 KIF25     | -828 CLDN18    | -524 KCNT2        | -220 ALDH1L1     | 85           |             |              |             |              |
| ANGPT1       | -1130 RHEBL1    | -827 MPP2      | -523 BICD1        | -219 HSD17B6     | 86           |             |              |             |              |
| OSR2         | -1129 TDRD9     | -826 CLEC5A    | -522 LOC283731    | -218 RASGEF1C    | 87           |             |              |             |              |
| KIF11        | -1128 PKDCC     | -825 PODNL1    | -521 NXPB2        | -217 DPY5        | 88           |             |              |             |              |
| LOC285847    | -1127 OLIG3     | -824 CPA5      | -520 KIF18B       | -216 CHAC1       | 89           |             |              |             |              |
| WISP1        | -1126 CPEB1     | -823 RBMXL2    | -519 SLITRK5      | -215 NCRNA00113  | 90           |             |              |             |              |
| TP63         | -1125 CLEC2A    | -822 TROAP     | -518 QPRT         | -214 CEACAM6     | 91           |             |              |             |              |
| ANKRD33      | -1124 ALDH1L2   | -821 GFRA3     | -517 NPW          | -213 TCEAL2      | 92           |             |              |             |              |
| GABRB2       | -1123 ITGA2     | -820 MMP16     | -516 NOX5         | -212 HIST1H3H    | 93           |             |              |             |              |
| FAM163B      | -1122 CTHRC1    | -819 TMEM52    | -515 KCTD16       | -211 LOC441177   | 94           |             |              |             |              |
| FABP6        | -1121 HAPLN1    | -818 C1orf135  | -514 CLDN3        | -210 SLC5A7      | 95           |             |              |             |              |
| LOC100302401 | -1120 SLC38A1   | -817 TWIST1    | -513 BCL2L10      | -209 PIP5K1B     | 96           |             |              |             |              |
| WDFY2        | -1119 NLGN2     | -816 AMZ1      | -512 HS3ST5       | -208 SULT1A2     | 97           |             |              |             |              |
| FLJ22536     | -1118 LGI1      | -815 RALGPS2   | -511 CDK5R2       | -207 RET         | 98           |             |              |             |              |
| MYO16        | -1117 ITPRIPL1  | -814 KIF5A     | -510 C2orf39      | -206 ALB         | 99           |             |              |             |              |
| FAM55C       | -1116 POSTN     | -813 LOC283392 | -509 KLRG2        | -205 SPACA3      | 100          |             |              |             |              |
| CHST11       | -1115 BUB1B     | -812 GDF6      | -508 CDC22        | -204 RNF182      | 101          |             |              |             |              |
| CASC5        | -1114 ADAMTS18  | -811 C9orf110  | -507 SOST         | -203 LAMP3       | 102          |             |              |             |              |
| ASTL         | -1113 CRP       | -810 C1orf110  | -506 C12orf53     | -202 DRD5        | 103          |             |              |             |              |
| SACS         | -1112 TERT      | -809 C6orf222  | -505 CAMKV        | -201 WNT7B       | 104          |             |              |             |              |
| BARD1        | -1111 DSC3      | -808 SPC24     | -504 EPGN         | -200 MYH7B       | 105          |             |              |             |              |
| FAM92A1      | -1110 RAB9B     | -807 POU3F1    | -503 CDH17        | -199 SSTR5       | 106          |             |              |             |              |
| CETN4P       | -1109 KLF14     | -806 LYPD6B    | -502 FZD9         | -198 FAM5B       | 107          |             |              |             |              |
| MGAT3        | -1108 WNT16     | -805 A4GNT     | -501 UGT1A8       | -197 IFIT1B      | 108          |             |              |             |              |
| CDC25A       | -1107 TMEM40    | -804 UBE2C     | -500 C9orf70      | -196 ADAMTS8     | 109          |             |              |             |              |
| SNHG4        | -1106 NTM       | -803 ELOVL4    | -499 FGFBP1       | -195 PTPRT       | 110          |             |              |             |              |
| SGCD         | -1105 GLDC      | -802 C15orf26  | -498 A1BG         | -194 HSH2D       | 111          |             |              |             |              |
| JPH2         | -1104 MAP1A     | -801 SLIT2     | -497 GRIA4        | -193 SPINK2      | 112          |             |              |             |              |
| ILDR2        | -1103 GGT8P     | -800 RUNX1T1   | -496 CNN1         | -192 NPY1R       | 113          |             |              |             |              |
| TAS2R5       | -1102 SLC38A3   | -799 FTCD      | -495 SAMD14       | -191 SERPINI1    | 114          |             |              |             |              |
| PI15         | -1101 CPLX3     | -798 CCDC144C  | -494 ACTBL2       | -190 TUBA3C      | 115          |             |              |             |              |
| CLCN4        | -1100 CLCF1     | -797 ARHGAP42  | -493 TNFRSF9      | -189 SLC7A4      | 116          |             |              |             |              |
| SUCNR1       | -1099 CCDC36    | -796 MCF2L2    | -492 MAP7D2       | -188 CFC1B       | 117          |             |              |             |              |
| RELL2        | -1098 PCNLX2    | -795 LOC647859 | -491 GCNT3        | -187 RAET1E      | 118          |             |              |             |              |
| MRAS         | -1097 KLK4      | -794 TMEM133   | -490 FHAD1        | -186 SYT4        | 119          |             |              |             |              |
| SNORA59B     | -1096 DENND2C   | -793 SRPK3     | -489 ACAN         | -185 COL9A3      | 120          |             |              |             |              |
| MMRN1        | -1095 CHRM4     | -792 GTSE1     | -488 KCNE1L       | -184 ARMS2       | 121          |             |              |             |              |
| GK3P         | -1094 CRABP2    | -791 NPR3      | -487 C11orf88     | -183 NTNG1       | 122          |             |              |             |              |
| PRR7         | -1093 FOXL1     | -790 KIF26B    | -486 C12orf70     | -182 HIST1H2BD   | 123          |             |              |             |              |
| CPA4         | -1092 C12orf77  | -789 S100A2    | -485 DGKI         | -181 LOC285696   | 124          |             |              |             |              |
| CDX1         | -1091 IQGAP3    | -788 CRTAC1    | -484 SLC9A4       | -180 POM121L2    | 125          |             |              |             |              |
| GP5          | -1090 CDC48     | -787 CCDC19    | -483 TTK          | -179 WSCD1       | 126          |             |              |             |              |
| ZDHC8C1      | -1089 C1QL4     | -786 SLC6A19   | -482 LOC100130933 | -178 IRX6        | 127          |             |              |             |              |
| PLAT         | -1088 C15orf42  | -785 SLC39A4   | -481 C20orf195    | -177 MARVELD3    | 128          |             |              |             |              |
| LOC728723    | -1087 C2CD4D    | -784 SLC13A5   | -480 BCAN         | -176 TGM1        | 129          |             |              |             |              |
| IRF6         | -1086 RAB33A    | -783 TMEM169   | -479 GAS2L3       | -175 ITGAD       | 130          |             |              |             |              |
| FAM72D       | -1085 PRKCG     | -782 FAM189A1  | -478 GUCY1A2      | -174 HIST1H4H    | 131          |             |              |             |              |
| COX6B2       | -1084 AURKB     | -781 SYT11     | -477 SCG5         | -173 SLC39A8     | 132          |             |              |             |              |
| CAMK2N2      | -1083 MYL6P     | -780 HAPLN4    | -476 NPXT2        | -172 PHACTR3     | 133          |             |              |             |              |
| NODAL        | -1082 PELI1     | -779 KBTBD12   | -475 ZNF667       | -171 LRAT        | 134          |             |              |             |              |
| HOXA3        | -1081 OR51E1    | -778 FLJ45983  | -474 HOXC11       | -170 PLAC2       | 135          |             |              |             |              |
| GPR45        | -1080 LGALS12   | -777 UGT2A1    | -473 PRR11        | -169 IRF7        | 136          |             |              |             |              |
| MELK         | -1079 MCM10     | -776 TNK1      | -472 RBM20        | -168 HERC6       | 137          |             |              |             |              |

|           |                  |                   |               |                   |     |
|-----------|------------------|-------------------|---------------|-------------------|-----|
| KRTAP5-8  | -1078 LOC440356  | -775 C9orf140     | -471 CALY     | -167 DPP6         | 138 |
| KIF12     | -1077 CCNE2      | -774 DRD1         | -470 PERP     | -166 KCNT1        | 139 |
| ARC       | -1076 PDE3A      | -773 CLIP3        | -469 NPM2     | -165 IFI44        | 140 |
| ALPK3     | -1075 LIPH       | -772 BLM          | -468 ADAMTS6  | -164 MX1          | 141 |
| SLC47A1   | -1074 FAM9C      | -771 NUF2         | -467 ENPP1    | -163 IFI6         | 142 |
| ARAP3     | -1073 OXCT2      | -770 FSHR         | -466 RNFT2    | -162 FAM167A      | 143 |
| KALRN     | -1072 NWD1       | -769 TEX9         | -465 UGT1A6   | -161 IFI44L       | 144 |
| CENPK     | -1071 C12orf39   | -768 TRHDE        | -464 SPATA12  | -160 C15orf48     | 145 |
| TDRD12    | -1070 TAS2R46    | -767 MIA          | -463 HTR2A    | -159 IGSF1        | 146 |
| MMP2      | -1069 C7orf57    | -766 DMP1         | -462 ODZ3     | -158 CLGN         | 147 |
| PRC1      | -1068 ABCB5      | -765 MMP13        | -461 PCDH20   | -157 ACSM1        | 148 |
| KDELC1    | -1067 THSD1      | -764 ACTG2        | -460 MSH4     | -156 RSAD2        | 149 |
| KCNN4     | -1066 CTXN2      | -763 ZNF699       | -459 CPNE7    | -155 REG1B        | 150 |
| GALNTL6   | -1065 CENPW      | -762 PSD2         | -458 SERPINE1 | -154 RPRM         | 151 |
| S100A5    | -1064 CDC45      | -761 ST6GALNAC3   | -457 MMP7     | -153 TRIM55       | 152 |
| C2orf65   | -1063 IRS1       | -760 RACGAP1P     | -456 RASL11B  | -152 PEX5L        | 153 |
| CDC113    | -1062 AKAP14     | -759 ALX1         | -455 DLX1     | -151 IL28A        | 154 |
| PORCN     | -1061 PBX4       | -758 KHDRBS2      | -454 C5orf46  | -150 CBLN1        | 155 |
| NELL2     | -1060 NEK2       | -757 TBXA2R       | -453 SEMA3D   | -149 LOC100132354 | 156 |
| ABCC4     | -1059 IGF2BP1    | -756 CPT1C        | -452 KRT80    | -148 C1orf173     | 157 |
| LRRC10B   | -1058 KCNMA1     | -755 THBS2        | -451 TNNC1    | -147 SLC4A4       | 158 |
| KIAA1462  | -1057 GPR3       | -754 GPR87        | -450 IQUB     | -146 UPK1B        | 159 |
| PM20D1    | -1056 PROM1      | -753 BUB1         | -449 TPSG1    | -145 PAH          | 160 |
| LOC653653 | -1055 MGAM       | -752 AADAC        | -448 FAT3     | -144 TJP3         | 161 |
| C10orf55  | -1054 AQP5       | -751 MURC         | -447 DLL3     | -143 PPARGC1A     | 162 |
| PRAME     | -1053 TPPP3      | -750 DYNC11I      | -446 DLX5     | -142 SLC26A9      | 163 |
| MTMR9L    | -1052 LGALS7B    | -749 GJC1         | -445 FBN2     | -141 ATP6V1B1     | 164 |
| GJB3      | -1051 HOXA1      | -748 CYP27B1      | -444 MAST1    | -140 LPHN3        | 165 |
| SLC2A10   | -1050 ARHGEF3    | -747 PTTG3P       | -443 ANKRD30B | -139 ITPKA        | 166 |
| FOSL1     | -1049 ZNF389     | -746 IGSF10       | -442 SPRR2D   | -138 Cxorf49B     | 167 |
| C6orf227  | -1048 LOC285629  | -745 C6orf168     | -441 DPEP1    | -137 KIR2DL3      | 168 |
| PVRL4     | -1047 GEM        | -744 KIF23        | -440 CACNA2D1 | -136 IFIT2        | 169 |
| HRNBP3    | -1046 SLC7A5     | -743 DNMI         | -439 TTLL7    | -135 KCNA1        | 170 |
| CDK15     | -1045 CENPF      | -742 DKKL1        | -438 TRIM50   | -134 FLJ42875     | 171 |
| C16orf45  | -1044 ABI3BP     | -741 CNGB1        | -437 VSTM2L   | -133 SAA1         | 172 |
| ZNF883    | -1043 PRR16      | -740 ZIC1         | -436 FGF5     | -132 ANXA9        | 173 |
| WNT3A     | -1042 REEP6      | -739 PODXL        | -435 SLC12A8  | -131 MT1DP        | 174 |
| KIAA1211  | -1041 CCNE1      | -738 KRT17        | -434 CENPI    | -130 TP53AIP1     | 175 |
| FRMD7     | -1040 KIAA1486   | -737 MYEF2        | -433 COL11A1  | -129 TRIM31       | 176 |
| CXCL13    | -1039 HSD17B2    | -736 LOC100216001 | -432 CD24     | -128 SSTR1        | 177 |
| SOX5      | -1038 SSC5D      | -735 GUCY1B2      | -431 PCYT1B   | -127 LIPF         | 178 |
| ZNF284    | -1037 ADORA2B    | -734 ANKRD1       | -430 FILIP1L  | -126 SERPINB7     | 179 |
| MAP3K13   | -1036 SLC22A1    | -733 EXO1         | -429 ZBTB8B   | -125 KCNB2        | 180 |
| NRADDP    | -1035 DEPD1C     | -732 FAM24B       | -428 IGF2     | -124 SPACA4       | 181 |
| THY1      | -1034 C7orf10    | -731 TNFRSF11B    | -427 TNC      | -123 RTP4         | 182 |
| MXRA5     | -1033 C2orf66    | -730 RASD2        | -426 ARNTL2   | -122 RARRES3      | 183 |
| LEM1      | -1032 SEC14L2    | -729 PTPRR        | -425 KIAA1199 | -121 POU3F3       | 184 |
| UGCG      | -1031 RHOB1B     | -728 KIF4A        | -424 UTS2     | -120 NOX1         | 185 |
| TMSB15B   | -1030 KIF15      | -727 SNORD116-4   | -423 VIT      | -119 ESR2         | 186 |
| MAPK10    | -1029 SPC25      | -726 SLC6A4       | -422 MLLT11   | -118 C12orf26     | 187 |
| HIST1H4A  | -1028 ITH5       | -725 C10orf140    | -421 HTR6     | -117 RICH2        | 188 |
| LY6D      | -1027 C3orf36    | -724 PTHLH        | -420 FAM163A  | -116 PKHD1L1      | 189 |
| RUNX2     | -1026 CEP55      | -723 C2orf89      | -419 SLC5A12  | -115 IFIT1        | 190 |
| RAD51AP2  | -1025 CENPE      | -722 ART4         | -418 PTPN13   | -114 EPHB6        | 191 |
| KLHDC8A   | -1024 NCRNA00175 | -721 RBM24        | -417 SPRR2E   | -113 C6orf208     | 192 |
| HOXA6     | -1023 TMEM92     | -720 ST6GALNAC1   | -416 LRRC49   | -112 CACHD1       | 193 |
| C5orf23   | -1022 SEMA3A     | -719 SERPINB13    | -415 GPC2     | -111 DAAM1        | 194 |
| LOC84740  | -1021 TSPAN5     | -718 SPSB4        | -414 SLC16A10 | -110 GPBAR1       | 195 |
| TNFAIP6   | -1020 RNAD       | -717 ZFP28        | -413 SBSN     | -109 HRASLS5      | 196 |
| LOC144486 | -1019 CSDC2      | -716 MYO22        | -412 SYTL5    | -108 C10orf105    | 197 |
| JAM3      | -1018 DAB1       | -715 CDH8         | -411 UGT1A10  | -107 AMN          | 198 |
| AFP       | -1017 TUBA4B     | -714 MYLK         | -410 SV2A     | -106 IFIT3        | 199 |
| PCDH7     | -1016 KIRREL3    | -713 SLC5A4       | -409 EDIL3    | -105 MAT1A        | 200 |
| HES7      | -1015 MYBL2      | -712 HGF          | -408 SHANK1   | -104 LOC286002    | 201 |
| DCBLD2    | -1014 KIAA0895   | -711 TMEM200A     | -407 SYT10    | -103 BBOX1        | 202 |
| CBLC      | -1013 ZYG11A     | -710 RNF43        | -406 GPR63    | -102 CHRDL2       | 203 |
| C13orf30  | -1012 CDC54      | -709 LRRC15       | -405 ZNF365   | -101 CPO          | 204 |
| PSRC1     | -1011 CSPG4      | -708 STMN2        | -404 ADAMTS14 | -100 STAC2        | 205 |
| MYOD1     | -1010 SPRR2G     | -707 SPRR2B       | -403 KRT7     | -99 ISG15         | 206 |
| ASAM      | -1009 CHRNA1     | -706 SALL1        | -402 SPRR2F   | -98 NNAT          | 207 |
| NRIP3     | -1008 AFF2       | -705 ICAM5        | -401 GLYATL2  | -97 KRTDAP        | 208 |
| TNS4      | -1007 SGO1       | -704 ACTN3        | -400 UCN2     | -96 TLR3          | 209 |
| CHST5     | -1006 CPS1       | -703 LIX1         | -399 SFTA1P   | -95 CKB           | 210 |
| CYBSR2    | -1005 SKA3       | -702 C3orf32      | -398 CHST6    | -94 RAB40A        | 211 |
| TK1       | -1004 SPESP1     | -701 SULF4A1      | -397 STRA6    | -93 CCL11         | 212 |
| CDKN3     | -1003 PRND       | -700 BPIL2        | -396 GPC6     | -92 KCNK5         | 213 |
| TMEM163   | -1002 MYLK2      | -699 FSIP1        | -395 IVL      | -91 INMT          | 214 |
| MGC16121  | -1001 RSPH9      | -698 C9orf4       | -394 OXTR     | -90 RAB40AL       | 215 |
| FGF10     | -1000 RASAL2     | -697 HAS2A5       | -393 ARTN     | -89 FCER2         | 216 |
| IL17D     | -999 OIT3        | -696 STXBPSL      | -392 PRR18    | -88 C4BPA         | 217 |
| XRCC6BP1  | -998 CNIH2       | -695 TTBK1        | -391 GALNT5   | -87 GLIPR1L2      | 218 |
| FAM135B   | -997 C6orf132    | -694 PAX6         | -390 LRRIQ1   | -86 UNC93A        | 219 |
| ADAM19    | -996 LOC90246    | -693 LAYN         | -389 IGFN1    | -85 ZFY           | 220 |
| PCDHA4    | -995 NEFM        | -692 GUCA1A       | -388 PPFA4    | -84 PIK3C2B       | 221 |
| LOC400804 | -994 CDC33       | -691 C19orf45     | -387 MFAP5    | -83 CREG2         | 222 |
| IL1RL2    | -993 C21orf62    | -690 CCDC151      | -386 VNN1     | -82 SOX6          | 223 |
| C9orf47   | -992 UPK1A       | -689 UNC13A       | -385 BRSK1    | -81 LINGO4        | 224 |
| LRP8      | -991 ATRNL1      | -688 FADS2        | -384 CA12     | -80 PDZD3         | 225 |
| CPA1      | -990 TMEM132A    | -687 DEPD1C       | -383 CD109    | -79 SLC6A3        | 226 |

|           |                   |                |                   |               |     |
|-----------|-------------------|----------------|-------------------|---------------|-----|
| RND1      | -989 GALNT8       | -686 DMD       | -382 IBSP         | -78 ADRA1B    | 227 |
| ETV1      | -988 AQP6         | -685 HSF2BP    | -381 MYOM3        | -77 SLC19A3   | 228 |
| PSD3      | -987 HPCAL4       | -684 COL24A1   | -380 CDH10        | -76 FCN1      | 229 |
| FAM72A    | -986 FAM26E       | -683 AQP10     | -379 SHC3         | -75 HIST1H1C  | 230 |
| LOC286467 | -985 ZNF677       | -682 ZNF135    | -378 KIAA1751     | -74 RAX2      | 231 |
| TRPA1     | -984 TMEM158      | -681 TSPAN11   | -377 DPF1         | -73 TST       | 232 |
| OBP2A     | -983 OCLN         | -680 DES       | -376 NPY          | -72 CSAG3     | 233 |
| ZNF423    | -982 TMEFF2       | -679 RNF128    | -375 ALPK2        | -71 SLC6A14   | 234 |
| TXNDC2    | -981 SERPINB5     | -678 MESTIT1   | -374 PALM3        | -70 SUSDA     | 235 |
| PNPLA3    | -980 FANCB        | -677 KIF3C     | -373 RGS4         | -69 TMEM114   | 236 |
| KIAA1549  | -979 COL10A1      | -676 C10orf107 | -372 TDRD6        | -68 C14orf176 | 237 |
| CCR8      | -978 SNAI1        | -675 CCDC150   | -371 LRCH2        | -67 KLHL31    | 238 |
| SLC27A5   | -977 ENTHD1       | -674 ACHE      | -370 SPOCD1       | -66 CYP4F11   | 239 |
| MAGEC3    | -976 ZNF221       | -673 EYA4      | -369 ITGB6        | -65 HS6ST3    | 240 |
| FAM157A   | -975 LPO          | -672 PDZD7     | -368 GAL3ST3      | -64 OAS1      | 241 |
| RUND2C2   | -974 TBX20        | -671 KIF4B     | -367 E2F8         | -63 STAP1     | 242 |
| KRT16     | -973 USP54        | -670 HOTAIR    | -366 NPPB         | -62 PKD1L2    | 243 |
| EXTL1     | -972 TMEM200C     | -669 HDGFRP3   | -365 INHBA        | -61 FAM134B   | 244 |
| COL2A1    | -971 TM4SF20      | -668 DAZL      | -364 C6orf141     | -60 CYP11A1   | 245 |
| PLK1      | -970 INPP4B       | -667 SRRM4     | -363 MGC45800     | -59 FBXO39    | 246 |
| PDLIM7    | -969 HAND2        | -666 GCKR      | -362 IL13RA2      | -58 TNFSF13B  | 247 |
| MOSP01    | -968 GATSL2       | -665 SCN2B     | -361 XIRP1        | -57 DGC5      | 248 |
| HTATIP2   | -967 COL3A1       | -664 OR51E2    | -360 SUGT1P1      | -56 SAA2      | 249 |
| GPR152    | -966 SCUBE1       | -663 SLC16A11  | -359 BEST3        | -55 IL18BP    | 250 |
| ADD2      | -965 KCTD14       | -662 ADAMTSL5  | -358 RSPO2        | -54 KCNA6     | 251 |
| MFHAS1    | -964 CRYM         | -661 TFF3      | -357 SLC38A4      | -53 LAMB3     | 252 |
| SYNGR3    | -963 GRID2        | -660 ANKRD43   | -356 TRIM46       | -52 SAA4      | 253 |
| DTL       | -962 CRABP1       | -659 CDCA2     | -355 EPYC         | -51 ANKK1     | 254 |
| CNN2      | -961 TRDN         | -658 VSX1      | -354 F5           | -50 MUC16     | 255 |
| CDK1      | -960 C12orf63     | -657 SLC25A27  | -353 LOC222699    | -49 RGS22     | 256 |
| NOX4      | -959 OLFML2B      | -656 PIF1      | -352 DACT2        | -48 USP18     | 257 |
| DCHS2     | -958 C11orf82     | -655 C21orf125 | -351 MOV10L1      | -47 GRAMD1C   | 258 |
| C21orf84  | -957 AQP2         | -654 TYRP1     | -350 UGT1A1       | -46 LOC400696 | 259 |
| AK5       | -956 LOC151174    | -653 SLC45A1   | -349 SYT5         | -45 ZBTB16    | 260 |
| SNTG1     | -955 CXCC4        | -652 ABCG4     | -348 TSPAN2       | -44 C13orf36  | 261 |
| SLC17A9   | -954 ORC1L        | -651 TEX15     | -347 ODZ2         | -43 BCO2      | 262 |
| PNPLA1    | -953 DEPD1        | -650 ENC1      | -346 NCRNA00189   | -42 IL29      | 263 |
| GBA3      | -952 PAD13        | -649 DSG3      | -345 ADAMTS5      | -41 C14orf68  | 264 |
| TRH       | -951 CYP2B7P1     | -648 TMEM90B   | -344 PHEX         | -40 PDZK1P1   | 265 |
| SLC7A5P1  | -950 KRTAP5-2     | -647 STAC      | -343 IGFL3        | -39 LOC644165 | 266 |
| LOC442421 | -949 GLB1L3       | -646 ROS1      | -342 UGT1A9       | -38 C17orf102 | 267 |
| AKR1B15   | -948 CCDC148      | -645 CILP      | -341 LOC554202    | -37 LOC146336 | 268 |
| SMPX      | -947 TNIP3        | -644 KCNQ5     | -340 CLDN1        | -36 CSAG1     | 269 |
| PRAP1     | -946 NPY6R        | -643 CCL28     | -339 SLC35D3      | -35 GHRHR     | 270 |
| CNTNAP1   | -945 C11orf20     | -642 PKP3      | -338 GPR176       | -34 LOC257358 | 271 |
| ADAM22    | -944 CDC20        | -641 HMSD      | -337 CDH2         | -33 LMX1B     | 272 |
| ZNF625    | -943 KIAA1614     | -640 MGC4473   | -336 FAM40B       | -32 SCARA3    | 273 |
| ULBP3     | -942 INPP5J       | -639 ANXA13    | -335 CAMK2A       | -31 ADCY3     | 274 |
| SOX2      | -941 AKR1E2       | -638 DAND5     | -334 MUC12        | -30 SELENBP1  | 275 |
| GTF2A1L   | -940 TNNI1        | -637 KRT13     | -333 KLHL38       | -29 TNNI3K    | 276 |
| ZNF833    | -939 PGBD1        | -636 SP9       | -332 ISL2         | -28 FHDC1     | 277 |
| RGS17     | -938 CUZD1        | -635 LOC157381 | -331 CCBE1        | -27 IFI27     | 278 |
| FAM179A   | -937 TGM4         | -634 RANBP3L   | -330 HSPB3        | -26 TCERG1L   | 279 |
| SLC7A11   | -936 L1CAM        | -633 LARP6     | -329 IGF2BP2      | -25 SMAD5OS   | 280 |
| S100A3    | -935 LOC100133893 | -632 FN1       | -328 APCDD1L      | -24 CRHBP     | 281 |
| GLI1      | -934 FOXC2        | -631 TMC3      | -327 CLDN16       | -23 SGPP2     | 282 |
| C19orf71  | -933 SLC45A2      | -630 IL12B     | -326 SULT1B1      | -22 TGM3      | 283 |
| HKDC1     | -932 KRT75        | -629 BCAS1     | -325 C12orf68     | -21 SLC28A3   | 284 |
| ZNF222    | -931 PAX3         | -628 ENOX1     | -324 CYP39A1      | -20 ZNF676    | 285 |
| SEC16B    | -930 NOS3         | -627 RBMS3     | -323 FRMD5        | -19 CCDC135   | 286 |
| AMBP      | -929 GLDN         | -626 CYP2C8    | -322 SLC22A3      | -18 C11orf67  | 287 |
| F2R       | -928 C1orf92      | -625 TIAM2     | -321 SBK2         | -17 MREG      | 288 |
| MEST      | -927 TREM1        | -624 LIN7A     | -320 SHOX2        | -16 HIST1H2AC | 289 |
| FOX51     | -926 FAM54A       | -623 DIRAS2    | -319 LHX9         | -15 FAM150A   | 290 |
| PTPN20B   | -925 SLC22A2      | -622 GIP       | -318 KCNN2        | -14 RBM46     | 291 |
| HUS1B     | -924 ME1          | -621 WDR66     | -317 INA          | -13 CYP4B1    | 292 |
| GRIK1     | -923 ZNF439       | -620 ARSI      | -316 IGFBP1       | -12 FAM3B     | 293 |
| AXL       | -922 CKAP2L       | -619 UNC5C     | -315 ADAMTS16     | -11 KIF26A    | 294 |
| H2BFXP    | -921 IRX4         | -618 DACT1     | -314 SEC14L4      | -10 LAG3      | 295 |
| OTX1      | -920 CALB1        | -617 CLDN14    | -313 SULT1E1      | -9 OVOL2      | 296 |
| DNAH2     | -919 ARL10        | -616 ISL1      | -312 DKFZp434J022 | -8 PHLPP2     | 297 |
| CCDC158   | -918 MYO1B        | -615 KAAG1     | -311 RASSF9       | -7 SCEL       | 298 |
| ADAM12    | -917 C6orf124     | -614 TLL1      | -310 TUBB2B       | -6 CYP3A43    | 299 |
| WDR49     | -916 TPRG1        | -613 SH3GL3    | -309 KRT14        | -5 HERC5      | 300 |
| FBXO32    | -915 NCAPH        | -612 B4GALNT1  | -308 NCRNA00162   | -4 KGFLP2     | 301 |
| BCAT1     | -914 TP53TG3B     | -611 HOXA11A5  | -307 DKK1         | -3 RASGRP4    | 302 |
| IGSF9B    | -913 EDNRA        | -610 SGF       | -306 RAB3B        | -2 NFKBIZ     | 303 |
| C3orf55   | -912 SOAT2        | -609 SEMA3E    | -305 KCNS1        | -1 KCNA5      | 304 |
| ZSWIM4    | -911 PPIA2        | -608 PRR5L     | -304 ADH1A        | 1 ALOX12B     | 305 |
| CYP251    | -910 NBP16        | -607 LTBP1     | -303 MRAP         | 2 FLJ35024    | 306 |
| ARL3      | -909 NGFR         | -606 SKA1      | -302 CHST4        | 3 ASPA        | 307 |
| SCT       | -908 ZNF471       | -605 GLP2R     | -301 FAM83E       | 4 GDDP5       | 308 |
| RPA4      | -907 TMEM233      | -604 TGFBI1    | -300 C14orf64     | 5 SLC14A1     | 309 |
| RDM1      | -906 TFR2         | -603 PTPLB     | -299 VIPR2        | 6 CARN51      | 310 |
| GSDMC     | -905 ZNF385D      | -602 KLHL4     | -298 ACE2         | 7 HIST1H1T    | 311 |
| FOXP2     | -904 TNFSF11      | -601 LCA5      | -297 DSCAML1      | 8 FAM164C     | 312 |
| SLC30A10  | -903 ISLR2        | -600 PKD1L1    | -296 PRIMA1       | 9 GRIA1       | 313 |
| NKAIN2    | -902 HHIP         | -599 ANLN      | -295 UGT3A1       | 10 ZBP1       | 314 |
| LCTL      | -901 CSRP3        | -598 IPMK      | -294 GAS2         | 11 AJAP1      | 315 |

|             |                |                |                   |                 |     |
|-------------|----------------|----------------|-------------------|-----------------|-----|
| DCDC1       | -900 PRSS3     | -597 MYBPC2    | -293 PRR15L       | 12 HIST1H2BC    | 316 |
| KCNH4       | -899 C3orf67   | -596 ZNF608    | -292 OLIG1        | 13 PLB1         | 317 |
| LOC55908    | -898 ERCC6L    | -595 TM6SF2    | -291 LIPM         | 14 CES4         | 318 |
| TMEM231     | -897 DENND2A   | -594 LOC730668 | -290 DMRTC1B      | 15 RSP04        | 319 |
| IFNE        | -896 KIF20A    | -593 FAM64A    | -289 ADH1B        | 16 C10orf95     | 320 |
| WDR62       | -895 ZIC2      | -592 BACH2     | -288 ADH6         | 17 GHR          | 321 |
| MIR155HG    | -894 HES2      | -591 FRG2C     | -287 RUFY4        | 18 PLEKHH2      | 322 |
| AVPR1A      | -893 XK        | -590 FIBCD1    | -286 SLC14A2      | 19 ACVR1C       | 323 |
| TSNAX-DISC1 | -892 EPHA3     | -589 SLITRK6   | -285 PKHD1        | 20 GPM6A        | 324 |
| NFE2L3      | -891 CDH6      | -588 INHBE     | -284 PKD1L3       | 21 PCDH11Y      | 325 |
| TRIP13      | -890 CCIN      | -587 MEIS3     | -283 ISM2         | 22 PCDHGB2      | 326 |
| NLRP14      | -889 KIAA1324  | -586 FZRL3     | -282 REG1A        | 23 CYS1         | 327 |
| KRT71       | -888 LXB1      | -585 KLC3      | -281 CDKN2A       | 24 CD209        | 328 |
| ITGA10      | -887 PTPRN     | -584 C19orf26  | -280 TGM5         | 25 CXCL6        | 329 |
| FAM131C     | -886 RIBC2     | -583 MCHR1     | -279 LOC154822    | 26 B3GNT7       | 330 |
| LOC121838   | -885 PDE4C     | -582 C10orf67  | -278 TUBAL3       | 27 POU2F3       | 331 |
| C17orf100   | -884 LYPD1     | -581 MGAT4C    | -277 RDH16        | 28 FSTL4        | 332 |
| SATB2       | -883 HERC2P4   | -580 NMNAT2    | -276 NRG3         | 29 LOC100128788 | 333 |
| GRIA2       | -882 CHRNA9    | -579 LCNL1     | -275 LOC100133465 | 30 RSP01        | 334 |
| GOLGA8C     | -881 TRPM3     | -578 C6orf186  | -274 CYP8B1       | 31 ALPI         | 335 |
| SLC17A7     | -880 SNX32     | -577 GDNF      | -273 CD300LD      | 32 EPB42        | 336 |
| NAV2        | -879 KCNK12    | -576 BEND6     | -272 CCL7         | 33 NT5C3        | 337 |
| FLJ30679    | -878 EMR4P     | -575 MMP23A    | -271 RBP4         | 34 HLF          | 338 |
| ELAVL3      | -877 SPRR2A    | -574 BTNL8     | -270 SORBS2       | 35 PAK7         | 339 |
| CCDC68      | -876 CDCA7     | -573 TRIM54    | -269 FGF7         | 36 OASL         | 340 |
| ATP6V0A4    | -875 FHOD3     | -572 LOXL2     | -268 KCNH5        | 37 S100A12      | 341 |
| SLC12A5     | -874 KCNAB3    | -571 C8orf84   | -267 PLA2G1B      | 38 IFIH1        | 342 |
| ARMC3       | -873 DNAH3     | -570 DLX3      | -266 BTBD16       | 39 C9           | 343 |
| PMAIP1      | -872 ZCCHC18   | -569 CCNA1     | -265 CXCL1        | 40 HIST1H2BK    | 344 |
| MYOZ3       | -871 LEPREL2   | -568 ILSRA     | -264 HP           | 41 CA4          | 345 |
| UGT1A7      | -870 LDLR      | -567 ATG9B     | -263 OR4N2        | 42 CYB5A        | 346 |
| IL1A        | -869 LOC441204 | -566 SNAP25    | -262 HPR          | 43 KIR3DL1      | 347 |
| KRT9        | -868 KRT79     | -565 SYNPO2L   | -261 LCN2         | 44 GFPT2        | 348 |
| VCAN        | -867 FMN2      | -564 GPR156    | -260 AGXT2L1      | 45 KANK4        | 349 |
| NOS2        | -866 ALOX15B   | -563 MAP6      | -259 CRB1         | 46 PLLP         | 350 |
| ARX         | -865 XRCC2     | -562 GSDMA     | -258 PCDH11X      | 47 SIGLEC16     | 351 |
| ULBP1       | -864 DST       | -561 HMGA2     | -257 RAET1G       | 48 CYP4F12      | 352 |
| FOXO3       | -863 NKX2-5    | -560 GNB3      | -256 BARX2        | 49 REC8         | 353 |
| TNFSF4      | -862 SLITRK1   | -559 COL5A2    | -255 NFE2         | 50 ALG1L        | 354 |
| TMEM90A     | -861 TCEAL7    | -558 KERA      | -254 C17orf77     | 51 NXNL2        | 355 |
| TCAM1P      | -860 S1PR3     | -557 SLITRK3   | -253 TAT          | 52 PHYHIP       | 356 |
| SGCE        | -859 OXGR1     | -556 ARHGAP6   | -252 DNAH9        | 53 RIMKLA       | 357 |
|             | NCRNA00181     | -555 NALCN     | -251 CXCR2P1      | 54 PLA2G2A      | 358 |
|             |                |                |                   | IL1RN           | 359 |
